# Supplementary material
Source: publisher site journal article supplement (https://www.dovepress.com/article/304847)
Supplement: Supplementary file 1 [file get_supplementary_file.php]

**Table S1**

| **Indicators** | AUC | 95%CI | *P*-value | Sensitivity | Specificity | Youden´s index |
| --- | --- | --- | --- | --- | --- | --- |
| SBP（mmHg） | 0.625 | 0.587-0.663 | <0.001 | 58.8% | 61.4% | 0.202 |
| DBP（mmHg） | 0.551 | 0.512-0.590 | 0.011 | 53.7% | 59.8% | 0.135 |
| PP（mmHg） | 0.617 | 0.579-0.655 | <0.001 | 65.5% | 53.7% | 0.193 |
| MAP（mmHg） | 0.603 | 0.565-0.641 | <0.001 | 62.2% | 57.8% | 0.200 |
| PPI | 0.591 | 0.553-0.630 | <0.001 | 63.1% | 55.2% | 0.183 |

**AUC of different blood pressure indicators**

**Abbreviations:** SBP, systolic blood pressure; PP, pulse pressure; MAP, mean arterial pressure; PPI, pulse pressure index; AUC, area under curve.

**Table S2**

**Nomogram Scores of different blood pressure indicators for stroke**

| **Indicators** | **SBP** | **DBP** | **MAP** | **PP** | **PPI** |
| --- | --- | --- | --- | --- | --- |
| **Blood pressure indicator** |  |  |  |  |  |
| Stage I | 0 | 0 | 0 | 0 | 0 |
| Stage II | 27 | 16 | 16 | 18 | 12 |
| Stage III | 54 | 33 | 32 | 36 | 24 |
| Stage IV | 81 | 49 | 48 | 53 | 36 |
| **HDL-C（mmol/L）** |  |  |  |  |  |
| <1.00 | 83 | 83 | 83 | 83 | 83 |
| 1.00-2.00 | 50 | 50 | 50 | 50 | 50 |
| 2.00-3.00 | 17 | 17 | 17 | 17 | 17 |
| >3.00 | 0 | 0 | 0 | 0 | 0 |
| **Hypertension** |  |  |  |  |  |
| Yes | 53 | 46 | 54 | 48 | 45 |
| No | 0 | 0 | 0 | 0 | 0 |
| **Coronary heart disease** |  |  |  |  |  |
| Yes | 43 | 44 | 48 | 43 | 45 |
| No | 0 | 0 | 0 | 0 | 0 |
| **Regular physical exercise** |  |  |  |  |  |
| <1 hour per day | 14 | 15 | 18 | 11 | 11 |
| ≥1 hour per day | 0 | 0 | 0 | 0 | 0 |
| **Total Points Risk** |  |  |  |  |  |
| 0.1 | 33 | 26 | 38 | 42 | 38 |
| 0.3 | 102 | 89 | 111 | 108 | 101 |
| 0.5 | 146 | 129 | 157 | 150 | 141 |
| 0.7 | 189 | 169 | 203 | 191 | 181 |

**Notes:** SBP and DBP were formed into four stages according to Guidelines for the prevention and treatment of hypertension in China 2017. PP, MAP and PPI were categorized into four stages according to quartiles from the lowest to the highest value.

**Abbreviations:** SBP, systolic blood pressure; DBP, diastolic blood pressure; PP, pulse pressure; MAP, mean arterial pressure; PPI, pulse pressure index.
